# Supplementary material
Source: PubMed Central journal article supplement (PMC6547125)
Supplement: jamapediatr-e191424-s002.pdf [file jamapediatr-e191424-s002.pdf]

## Supplementary Online Content

Flaherman VJ, Cabana MD, McCulloch CE, Paul IM. Effect of early limited formula on breastfeeding duration in the first year of life: a randomized clinical trial. *JAMA Pediatr*. Published online June 3, 2019.  
doi:10.1001/jamapediatrics.2019.1424

**eTable 1.** Breastfeeding Prevalence at 6 and 12 Months Within Subgroups Unevenly Distributed at Baseline or Pre-specified and Within Each Site, by Treatment Assignment

**eTable 2.** Univariate and Multivariable Hazard Ratios (HR) for Demographic and Clinical Predictors Present at Birth, of Time to Breastfeeding Cessation Through Age 12 Months

This supplementary material has been provided by the authors to give readers additional information about their work.

**eTable 1. Breastfeeding Prevalence at 6 and 12 Months Within Subgroups Unevenly Distributed at Baseline or Pre-specified and Within Each Site, by Treatment Assignment**

| Subgroup                                                           | Early Limited Formula, n (%) | Control, n (%) | p-value |
|--------------------------------------------------------------------|------------------------------|----------------|---------|
| <b>Married mothers</b>                                             |                              |                |         |
| Any breastfeeding at 6 months                                      | 34 (72)                      | 52 (81)        | 0.18    |
| Any breastfeeding at 12 months                                     | 18 (38)                      | 32 (51)        | 0.19    |
| <b>Unmarried mothers</b>                                           |                              |                |         |
| Any breastfeeding at 6 months                                      | 12 (50)                      | 7 (54)         | 0.82    |
| Any breastfeeding at 12 months                                     | 3 (13)                       | 4 (31)         | 0.20    |
| <b>Mothers with planned duration of breastfeeding ≤6 months</b>    |                              |                |         |
| Any breastfeeding at 6 months                                      | 18 (51)                      | 15 (62)        | 0.40    |
| Any breastfeeding at 12 months                                     | 7 (20)                       | 7 (30)         | 0.36    |
| <b>Mothers with planned duration of breastfeeding &gt;6 months</b> |                              |                |         |
| Any breastfeeding at 6 months                                      | 24 (77)                      | 40 (91)        | 0.10    |
| Any breastfeeding at 12 months                                     | 12 (40)                      | 25 (56)        | 0.19    |
| <b>Enrolled at Penn State</b>                                      |                              |                |         |
| Any breastfeeding at 6 months                                      | 17 (47)                      | 22 (60)        | 0.20    |
| Any breastfeeding at 12 months                                     | 7 (20)                       | 10 (27)        | 0.48    |
| <b>Enrolled at UCSF</b>                                            |                              |                |         |
| Any breastfeeding at 6 months                                      | 30 (83)                      | 38 (93)        | 0.20    |
| Any breastfeeding at 12 months                                     | 14 (39)                      | 27 (67)        | 0.01    |
| <b>Household annual income &lt;\$50,000</b>                        |                              |                |         |
| Any breastfeeding at 6 months                                      | 12 (50)                      | 12 (57)        | 0.77    |
| Any breastfeeding at 12 months                                     | 5 (23)                       | 5 (26)         | 1.00    |
| <b>Household annual income ≥\$50,000</b>                           |                              |                |         |
| Any breastfeeding at 6 months                                      | 38 (70)                      | 50 (81)        | 0.28    |
| Any breastfeeding at 12 months                                     | 17 (31)                      | 33 (53)        | 0.02    |

**eTable 2. Univariate and Multivariable Hazard Ratios (HR) for Demographic and Clinical Predictors Present at Birth, of Time to Breastfeeding Cessation Through Age 12 Months**

| Predictors present at birth             | Univariate HR<br>(95% Confidence Interval) | Multivariable HR<br>(95% Confidence Interval) |
|-----------------------------------------|--------------------------------------------|-----------------------------------------------|
| Gestational age (wk)                    | 0.90 (0.76, 1.09)                          | *                                             |
| Vaginal delivery                        | 0.82 (0.52, 1.30)                          | 0.81 (0.47, 1.40)                             |
| Maternal age (y)                        | <b>0.93 (0.90, 0.97)</b>                   | 0.98 (0.93, 1.03)                             |
| Maternal race-ethnicity                 |                                            |                                               |
| White non-Hispanic                      | ref                                        | ref                                           |
| Black non-Hispanic                      | 1.03 (0.32, 3.27)                          | 0.96 (0.23, 4.10)                             |
| Hispanic                                | 0.6 (0.34, 1.37)                           | 0.53 (0.21, 1.34)                             |
| Asian                                   | <b>0.43 (0.20, 0.93)</b>                   | 0.66 (0.26, 1.67)                             |
| Other                                   | 0.71 (0.26, 1.95)                          | 0.59 (0.13, 2.69)                             |
| Maternal educational attainment         |                                            |                                               |
| 8 <sup>th</sup> grade or less           | 3.18 (0.43, 23.5)                          | 4.10 (0.51, 33.3)                             |
| Some high school                        | <b>3.48 (1.06, 11.4)</b>                   | <b>11.3 (1.64, 77.6)</b>                      |
| High school graduate                    | 1.53 (0.71, 3.32)                          | 1.28 (0.44, 3.71)                             |
| Some college or technical school        | <b>2.68 (1.60, 4.48)</b>                   | 1.69 (0.69, 4.16)                             |
| Completed college                       | ref                                        | ref                                           |
| Postgraduate training                   | 0.76 (0.10, 5.59)                          | 1.05 (0.56, 1.96)                             |
| Married                                 | <b>0.46 (0.30, 0.71)</b>                   | <b>0.48 (0.25, 0.90)</b>                      |
| Primiparous                             | 0.79 (0.52, 1.18)                          | *                                             |
| Mother with breastfeeding experience    | 1.14 (0.76, 1.71)                          | *                                             |
| Intended breastfeeding duration (month) | <b>0.90 (0.85, 0.95)</b>                   | <b>0.91 (0.86, 0.96)</b>                      |
| Household annual income, <i>n</i> (%)   |                                            |                                               |
| <\$10,000                               | <b>4.87 (1.16, 20.5)</b>                   | 2.46 (0.42, 14.2)                             |
| \$10,000-\$24,999                       | <b>2.32 (1.16, 4.67)</b>                   | 0.41 (0.08, 2.15)                             |
| \$25,000-\$49,999                       | <b>2.10 (1.12, 3.95)</b>                   | 0.79 (0.28, 2.26)                             |
| \$50,000-\$74,999                       | 1.76 (0.90, 3.44)                          | 1.01 (0.41, 2.48)                             |
| \$75,000-\$100,000                      | 1.67 (0.83, 3.34)                          | 1.33 (0.57, 3.11)                             |
| >\$100,000                              | ref                                        | ref                                           |
| Unknown/Declined                        | <b>2.77 (1.41, 5.43)</b>                   | 1.25 (0.44, 3.51)                             |
| Enrolled at Penn State                  | <b>2.39 (1.57, 3.62)</b>                   | 1.92 (0.96, 3.86)                             |

\*Omitted from multivariable model because bivariate association not demonstrated
