# Supplementary material
Source: PubMed Central journal article supplement (PMC6547125)
Supplement: jamapediatr-e191424-s003.pdf [file jamapediatr-e191424-s003.pdf]

## Data Sharing Statement

Flaherman. Effect of Early Limited Formula on Breastfeeding Duration in the First Year of Life. *JAMA Pediatr*. Published June 03, 2019. 10.1001/jamapediatrics.2019.1424

### Data

**Data available:** No
